# Supplementary material
Source: ML conference proceedings conference paper supplement (https://openreview.net/forum?id=VhcsIxVEd9)
Supplement: supplementary_material [file attachment]

# 1 **Supplementary Material for DropPos: Pre-Training Vision Transformers by** 2 **Reconstructing Dropped Positions**

3 In this supplementary material, we first provide mode implementation details for reproducibility  
4 in Sec. A. Next, in Sec. B, we evaluate the performance of the position reconstruction task using  
5 pre-trained models under different settings, and we provide more evidence to support the proposed  
6 three difficulties in Sec. 1.

## 7 **A Implementation details**

8 **ViT architecture.** We follow the standard vanilla ViT [8] architecture used in MAE [9] as the  
9 backbone, which is a stack of Transformer blocks [17]. Following MAE [9], we use the fixed 2D  
10 sine-cosine positional embeddings during pre-training. For the downstream classification task, we  
11 use features globally averaged from the encoder output for both end-to-end fine-tuning.

12 **Effective training epochs.** Following iBOT [24], we take the effective training epochs as the metric  
13 of the training schedule, due to extra computation costs brought by the multi-crop [2] augmentation,  
14 which is a widely used technique for contrastive methods. Specifically, the effective training epochs  
15 are defined as the actual pre-training epochs multiplied with a scaling factor  $r$ . For instance, DINO [3]  
16 is trained with 2 global  $224 \times 224$  crops and 10 local  $96 \times 96$  crops, and thus  $r = 2 + (96/224)^2 \times 10 \approx$   
17 4. More details and examples can be found in [24].

### 18 **A.1 ImageNet classification**

19 For all experiments in this paper, we take ImageNet-1K [16], which contains 1.3M images for 1K  
20 categories, as the pre-trained dataset. By default, we take ViT-B/16 [8] as the backbone and it is  
21 pre-trained 200 epochs followed by 100 epochs of end-to-end fine-tuning. Implementation details can  
22 be found in the following table. Most of the configurations are borrowed from MAE [9]. The linear  
23 learning rate scaling rule is adopted:  $lr = lr_{\text{base}} \times \text{batch\_size} / 256$ . For supervised training from  
24 scratch, we simply follow the fine-tuning setting without another tuning. For ViT-B/16, pre-training  
25 and fine-tuning are conducted with 64 and 32 2080Ti GPUs, respectively. For ViT-L/16, pre-training  
26 and fine-tuning are conducted with 32 and 16 Tesla V100 GPUs, respectively.

| config                 | pre-training                   | fine-tuning                     |
|------------------------|--------------------------------|---------------------------------|
| optimizer              | AdamW                          | AdamW                           |
| base learning rate     | 1.5e-4                         | 1e-3                            |
| weight decay           | 0.05                           | 0.05                            |
| momentum               | $\beta_1, \beta_2 = 0.9, 0.95$ | $\beta_1, \beta_2 = 0.9, 0.999$ |
| layer-wise lr decay    | 1.0                            | 0.8                             |
| batch size             | 4096                           | 1024                            |
| learning rate schedule | cosine decay                   | cosine decay                    |
| warmup epochs          | 10 (ViT-B/16), 40 (ViT-L/16)   | 5                               |
| training epochs        | 200                            | 100 (ViT-B/16), 50 (ViT-L/16)   |
| augmentation           | RandomResizedCrop              | RandAug (9, 0.5) [6]            |
| label smoothing        | -                              | 0.1                             |
| mixup [22]             | -                              | 0.8                             |
| cutmix [21]            | -                              | 1.0                             |
| drop path [11]         | -                              | 0.1                             |

### 27 **A.2 COCO object detection and segmentation**

28 We take Mask R-CNN [10] with FPN [14] as the object detector. Following [9] and [18], to obtain  
29 pyramid feature maps for matching the requirements of FPN [14], whose feature maps are all with a  
30 stride of 16, we equally divide the backbone into 4 subsets, each consisting of a last global-window  
31 block and several local-window blocks otherwise, and then apply convolutions to get the intermediate  
32 feature maps at different scales (stride 4, 8, 16, or 32).

33 We perform end-to-end fine-tuning on COCO [15] for  $1 \times$  schedule with  $1024 \times 1024$  resolution,  
34 where 88,750 iterations of training with a batch size of 16 are performed. We simply follow the  
35 configuration of ViTDet [13], where the learning rate is  $3e-4$  and decays at the 78,889-th and 85,463-th  
36 iteration by a factor of 10. Experiments are conducted on 8 Tesla V100 GPUs.

Table S1: Top-1 accuracy of position reconstruction using ViT-B/16 [8] pre-trained with **different mask ratio**  $\gamma$ . We underline the special parameter different from our default settings. Default settings are **highlighted** in color. “Avg. acc” is the *averaged* top-1 accuracy over 16 different cases. We evaluate the performance using the *same* pre-trained model under different  $\gamma$  and  $\gamma_{\text{pos}}$ . Larger  $\gamma$  and  $\gamma_{\text{pos}}$  indicates a more challenging task.

| (a) Pre-training with $\gamma = 0$ (Avg. acc: 59.79). |       |       |       |       |       | (b) Pre-training with $\gamma = 0.25$ (Avg. acc: 79.62). |       |       |       |       |       |
|-------------------------------------------------------|-------|-------|-------|-------|-------|----------------------------------------------------------|-------|-------|-------|-------|-------|
| $\gamma \backslash \gamma_{\text{pos}}$               | 0.25  | 0.50  | 0.75  | 0.95  | avg.  | $\gamma \backslash \gamma_{\text{pos}}$                  | 0.25  | 0.50  | 0.75  | 0.95  | avg.  |
| 0.00                                                  | 99.37 | 99.26 | 99.15 | 98.34 | 99.03 | 0.00                                                     | 99.24 | 99.26 | 99.18 | 98.92 | 99.15 |
| 0.25                                                  | 87.97 | 87.45 | 86.20 | 70.79 | 83.10 | 0.25                                                     | 98.67 | 98.81 | 98.63 | 97.21 | 98.33 |
| 0.50                                                  | 55.37 | 55.11 | 49.84 | 22.96 | 45.82 | 0.50                                                     | 93.96 | 93.62 | 90.01 | 62.11 | 84.93 |
| 0.75                                                  | 12.99 | 14.85 | 12.85 | 4.21  | 11.23 | 0.75                                                     | 50.02 | 47.79 | 35.03 | 11.46 | 36.08 |

  

| (c) Pre-training with $\gamma = 0.5$ (Avg. acc: 87.27). |       |       |       |       |       | (d) Pre-training with $\gamma = 0.75$ (Avg. acc: 87.83). |       |       |       |       |       |
|---------------------------------------------------------|-------|-------|-------|-------|-------|----------------------------------------------------------|-------|-------|-------|-------|-------|
| $\gamma \backslash \gamma_{\text{pos}}$                 | 0.25  | 0.50  | 0.75  | 0.95  | avg.  | $\gamma \backslash \gamma_{\text{pos}}$                  | 0.25  | 0.50  | 0.75  | 0.95  | avg.  |
| 0.00                                                    | 99.33 | 99.23 | 99.13 | 98.85 | 99.14 | 0.00                                                     | 97.19 | 98.69 | 98.20 | 92.30 | 96.60 |
| 0.25                                                    | 99.05 | 98.95 | 98.78 | 98.20 | 98.75 | 0.25                                                     | 96.78 | 98.26 | 97.66 | 91.05 | 95.93 |
| 0.50                                                    | 94.60 | 95.94 | 94.28 | 83.31 | 92.03 | 0.50                                                     | 97.26 | 96.82 | 95.66 | 89.12 | 94.72 |
| 0.75                                                    | 78.77 | 72.75 | 59.54 | 25.59 | 59.16 | 0.75                                                     | 79.94 | 78.10 | 68.73 | 40.24 | 66.75 |

### 37 A.3 ADE20k semantic segmentation

38 We take UperNet [20] as the segmentation decoder following the code of [1, 5, 18]. Fine-tuning  
 39 on ADE20k [23] for 80k iterations is performed. Specifically, each iteration consists of 16 images  
 40 with  $512 \times 512$  resolution. The AdamW optimizer is adopted with an initial learning rate of  $7e-4$   
 41 and a weight decay of 0.05 with ViT-B. We apply a polynomial learning rate schedule with the first  
 42 warmup of 1500 iterations following common practice [18, 5, 1]. When fine-tuning using backbones  
 43 pre-trained with different methods, we search for the optimal learning rate or simply follow their  
 44 official implementation for a fair comparison. Specifically, the learning rate is  $1e-4$  for [4, 9, 12],  
 45  $4e-4$  for [7, 19], respectively. All experiments are conducted on 8 Tesla V100 GPUs.

## 46 B Performance of position reconstruction

47 In this section, we evaluate the performance of the position reconstruction task using pre-trained  
 48 models under different settings. Specifically, we vary  $\gamma \in \{0, 0.25, 0.5, 0.75\}$  and  $\gamma_{\text{pos}} \in$   
 49  $\{0.25, 0.5, 0.75, 0.95\}$  when measuring the position prediction accuracy. We report performance  
 50 under different evaluation settings as well as the *averaged* accuracy among 16 different cases. From  
 51 Tabs. S1 to S3, we find evidence to support the three difficulties for designing an appropriate position-  
 52 related pretext task introduced in Sec. 1: (i) discrepancies between pre-training and fine-tuning, (ii)  
 53 failing to learn highly semantic representations by solving this simple position reconstruction task,  
 54 and (iii) difficult to decide which patch positions to reconstruct precisely.

55 We study the effectiveness of different values of  $\gamma$  during pre-training in Tab. S1. Interestingly, we  
 56 find evidence for *failing to learn highly semantic representations by solving this simple position*  
 57 *reconstruction task*. As illustrated by Tab. S1a, the pre-trained model performs *extremely well* when  
 58 we set  $\gamma = 0$  for evaluation but fails to keep this trend when we enlarge  $\gamma$ . This indicates that given  
 59 the strength of ViTs in modeling long-range dependencies, they have easily solved this task in a  
 60 superficial way, and thus pre-training with  $\gamma = 0$  becomes trivial for ViTs. To this end, an appropriate  
 61  $\gamma$  is necessary to increase the difficulty of the pretext task and avoid trivial solutions.

62 We study the effectiveness of different values of  $\gamma_{\text{pos}}$  during pre-training in Tab. S2, and we find  
 63 evidence for *discrepancies between pre-training and fine-tuning*. As shown by Tab. S2d, the model  
 64 fails to reconstruct accurate positions given some visible anchors. This is because the model has  
 65 *never* been exposed to any positional embeddings (PEs) during pre-training. Therefore, providing  
 66 some anchors is necessary to address discrepancies. Also, it may help the model focus on modeling  
 67 *relative* relationships instead of simply reconstructing absolute positions.

Table S2: Top-1 accuracy of position reconstruction using ViT-B/16 [8] pre-trained with **different positional mask ratio**  $\gamma_{\text{pos}}$ . We underline the special parameter different from our default settings.

(a) Pre-training with  $\gamma_{\text{pos}} = 0.25$  (Avg. acc: 65.19).

| $\gamma \backslash \gamma_{\text{pos}}$ | 0.25  | 0.50  | 0.75  | 0.95  |
|-----------------------------------------|-------|-------|-------|-------|
| 0.00                                    | 96.52 | 89.38 | 59.29 | 14.58 |
| 0.25                                    | 96.62 | 91.27 | 66.00 | 19.17 |
| 0.50                                    | 95.58 | 91.10 | 72.07 | 21.69 |
| 0.75                                    | 80.56 | 73.72 | 57.89 | 17.66 |
| avg.                                    | 92.32 | 86.37 | 63.81 | 18.28 |

(b) Pre-training with  $\gamma_{\text{pos}} = 0.5$  (Avg. acc: 86.70).

| $\gamma \backslash \gamma_{\text{pos}}$ | 0.25  | 0.50  | 0.75  | 0.95  |
|-----------------------------------------|-------|-------|-------|-------|
| 0.00                                    | 98.98 | 98.81 | 98.24 | 92.80 |
| 0.25                                    | 98.59 | 98.34 | 97.51 | 89.73 |
| 0.50                                    | 96.63 | 95.85 | 93.40 | 74.38 |
| 0.75                                    | 81.94 | 76.70 | 64.87 | 30.44 |
| avg.                                    | 94.04 | 92.43 | 88.51 | 71.84 |

(c) Pre-training with  $\gamma_{\text{pos}} = 0.75$  (Avg. acc: 87.83).

| $\gamma \backslash \gamma_{\text{pos}}$ | 0.25  | 0.50  | 0.75  | 0.95  |
|-----------------------------------------|-------|-------|-------|-------|
| 0.00                                    | 97.19 | 98.69 | 98.20 | 92.30 |
| 0.25                                    | 96.78 | 98.26 | 97.66 | 91.05 |
| 0.50                                    | 97.26 | 96.82 | 95.66 | 89.12 |
| 0.75                                    | 79.94 | 78.10 | 68.73 | 40.24 |
| avg.                                    | 92.79 | 92.97 | 90.06 | 78.18 |

(d) Pre-training with  $\gamma_{\text{pos}} = 1$  (Avg. acc: 19.44).

| $\gamma \backslash \gamma_{\text{pos}}$ | 0.25  | 0.50  | 0.75  | 0.95  |
|-----------------------------------------|-------|-------|-------|-------|
| 0.00                                    | 15.57 | 23.24 | 20.41 | 23.59 |
| 0.25                                    | 12.51 | 21.10 | 24.30 | 29.41 |
| 0.50                                    | 7.76  | 14.18 | 25.56 | 45.01 |
| 0.75                                    | 3.34  | 6.00  | 12.53 | 26.45 |
| avg.                                    | 9.80  | 16.13 | 20.70 | 31.12 |

Table S3: Top-1 accuracy of position reconstruction using ViT-B/16 [8] pre-trained with **different (i)  $\sigma$  and (ii)  $\tau$** . We underline the special parameter different from our default settings.

(a) Pre-training with  $\sigma = 0$  (Avg. acc: 88.81).

| $\gamma \backslash \gamma_{\text{pos}}$ | 0.25  | 0.50  | 0.75  | 0.95  |
|-----------------------------------------|-------|-------|-------|-------|
| 0.00                                    | 98.48 | 98.74 | 98.29 | 94.37 |
| 0.25                                    | 98.06 | 98.31 | 97.76 | 93.48 |
| 0.50                                    | 96.06 | 96.08 | 94.48 | 85.49 |
| 0.75                                    | 82.19 | 78.64 | 69.39 | 41.23 |

(b) Pre-training with  $\sigma = 1$  (Avg. acc: 87.13).

| $\gamma \backslash \gamma_{\text{pos}}$ | 0.25  | 0.50  | 0.75  | 0.95  |
|-----------------------------------------|-------|-------|-------|-------|
| 0.00                                    | 97.03 | 98.50 | 97.93 | 91.40 |
| 0.25                                    | 96.63 | 98.04 | 97.33 | 89.69 |
| 0.50                                    | 94.30 | 95.58 | 93.68 | 81.47 |
| 0.75                                    | 79.14 | 77.06 | 67.43 | 38.89 |

(c) Pre-training with  $\sigma = 2$  (Avg. acc: 69.48).

| $\gamma \backslash \gamma_{\text{pos}}$ | 0.25  | 0.50  | 0.75  | 0.95  |
|-----------------------------------------|-------|-------|-------|-------|
| 0.00                                    | 78.45 | 78.81 | 78.19 | 72.33 |
| 0.25                                    | 78.03 | 78.41 | 77.68 | 70.49 |
| 0.50                                    | 76.14 | 76.27 | 74.53 | 63.52 |
| 0.75                                    | 63.75 | 61.21 | 53.30 | 30.47 |

(d) Pre-training with  $\sigma = 1 \rightarrow 0$  (Avg. acc: 87.83).

| $\gamma \backslash \gamma_{\text{pos}}$ | 0.25  | 0.50  | 0.75  | 0.95  |
|-----------------------------------------|-------|-------|-------|-------|
| 0.00                                    | 97.19 | 98.69 | 98.20 | 92.30 |
| 0.25                                    | 96.78 | 98.26 | 97.66 | 91.05 |
| 0.50                                    | 97.26 | 96.82 | 95.66 | 89.12 |
| 0.75                                    | 79.94 | 78.10 | 68.73 | 40.24 |

(e) Pre-training with  $\sigma = 2 \rightarrow 0$  (Avg. acc: 87.65).

| $\gamma \backslash \gamma_{\text{pos}}$ | 0.25  | 0.50  | 0.75  | 0.95  |
|-----------------------------------------|-------|-------|-------|-------|
| 0.00                                    | 97.63 | 98.61 | 97.93 | 91.30 |
| 0.25                                    | 97.22 | 98.19 | 97.46 | 89.96 |
| 0.50                                    | 94.99 | 95.85 | 94.06 | 82.50 |
| 0.75                                    | 80.33 | 77.92 | 68.42 | 40.11 |

(f) Pre-training with  $\tau = \infty$  (Avg. acc: 88.66).

| $\gamma \backslash \gamma_{\text{pos}}$ | 0.25  | 0.50  | 0.75  | 0.95  |
|-----------------------------------------|-------|-------|-------|-------|
| 0.00                                    | 98.66 | 98.31 | 97.72 | 91.22 |
| 0.25                                    | 98.54 | 98.17 | 97.46 | 91.00 |
| 0.50                                    | 96.85 | 96.20 | 94.52 | 84.64 |
| 0.75                                    | 83.57 | 79.30 | 70.04 | 42.29 |

(g) Pre-training with  $\tau = 0.1$  (Avg. acc: 87.83).

| $\gamma \backslash \gamma_{\text{pos}}$ | 0.25  | 0.50  | 0.75  | 0.95  |
|-----------------------------------------|-------|-------|-------|-------|
| 0.00                                    | 97.19 | 98.69 | 98.20 | 92.30 |
| 0.25                                    | 96.78 | 98.26 | 97.66 | 91.05 |
| 0.50                                    | 97.26 | 96.82 | 95.66 | 89.12 |
| 0.75                                    | 79.94 | 78.10 | 68.73 | 40.24 |

(h) Pre-training with  $\tau = 0.5$  (Avg. acc: 87.78).

| $\gamma \backslash \gamma_{\text{pos}}$ | 0.25  | 0.50  | 0.75  | 0.95  |
|-----------------------------------------|-------|-------|-------|-------|
| 0.00                                    | 97.68 | 97.94 | 97.82 | 91.78 |
| 0.25                                    | 97.83 | 97.91 | 97.53 | 91.01 |
| 0.50                                    | 96.44 | 96.06 | 94.52 | 84.49 |
| 0.75                                    | 80.16 | 77.16 | 66.01 | 40.18 |

68 We study the effectiveness of different values of  $\gamma_{\text{pos}}$  during pre-training in Tab. S2, and we find  
69 evidence for *hard to decide which patch positions to reconstruct precisely*. As shown by Tabs. S3a  
70 and S3f, the model achieves higher position prediction accuracy but performs worse on downstream  
71 tasks (please refer to Tabs. 3 and 4 for downstream performances). Therefore, to prevent being  
72 overwhelmed by this particular position reconstruction task, techniques for relaxing the patch-wise  
73 classification problem become necessary, *i.e.*, position smoothing, and attentive reconstruction.

## 74 References

- 75 [1] Hangbo Bao, Li Dong, Songhao Piao, and Furu Wei. Beit: Bert pre-training of image transformers. In  
76 *International Conference on Learning Representations (ICLR)*, 2022.
- 77 [2] Mathilde Caron, Ishan Misra, Julien Mairal, Priya Goyal, Piotr Bojanowski, and Armand Joulin.  
78 Unsupervised learning of visual features by contrasting cluster assignments. *Advances in Neural*  
79 *Information Processing Systems (NeurIPS)*, 33:9912–9924, 2020.
- 80 [3] Mathilde Caron, Hugo Touvron, Ishan Misra, Hervé Jégou, Julien Mairal, Piotr Bojanowski, and Armand  
81 Joulin. Emerging properties in self-supervised vision transformers. In *Proceedings of the IEEE/CVF*  
82 *International Conference on Computer Vision (ICCV)*, pages 9650–9660, 2021.
- 83 [4] Xinlei Chen, Saining Xie, and Kaiming He. An empirical study of training self-supervised vision  
84 transformers. In *Proceedings of the IEEE/CVF International Conference on Computer Vision (ICCV)*,  
85 pages 9640–9649, 2021.
- 86 [5] MMSegmentation Contributors. MMSegmentation: Openmmlab semantic segmentation toolbox and  
87 benchmark. <https://github.com/open-mmlab/mms Segmentation>, 2020.
- 88 [6] Ekin D Cubuk, Barret Zoph, Jonathon Shlens, and Quoc V Le. Randaugment: Practical automated data  
89 augmentation with a reduced search space. In *Proceedings of the IEEE/CVF Conference on Computer*  
90 *Vision and Pattern Recognition Workshop (CVPRW)*, pages 702–703, 2020.
- 91 [7] Xiaoyi Dong, Jianmin Bao, Ting Zhang, Dongdong Chen, Weiming Zhang, Lu Yuan, Dong Chen, Fang  
92 Wen, and Nenghai Yu. Bootstrapped masked autoencoders for vision bert pretraining. In *European*  
93 *Conference on Computer Vision (ECCV)*, pages 247–264. Springer, 2022.
- 94 [8] Alexey Dosovitskiy, Lucas Beyer, Alexander Kolesnikov, Dirk Weissenborn, Xiaohua Zhai, Thomas  
95 Unterthiner, Mostafa Dehghani, Matthias Minderer, Georg Heigold, Sylvain Gelly, et al. An image is  
96 worth 16x16 words: Transformers for image recognition at scale. In *International Conference on Learning*  
97 *Representations (ICLR)*, 2021.
- 98 [9] Kaiming He, Xinlei Chen, Saining Xie, Yanghao Li, Piotr Dollár, and Ross Girshick. Masked autoencoders  
99 are scalable vision learners. In *Proceedings of the IEEE/CVF Conference on Computer Vision and Pattern*  
100 *Recognition (CVPR)*, pages 16000–16009, 2022.
- 101 [10] Kaiming He, Georgia Gkioxari, Piotr Dollár, and Ross Girshick. Mask r-cnn. In *Proceedings of the*  
102 *IEEE/CVF International Conference on Computer Vision (ICCV)*, pages 2961–2969, 2017.
- 103 [11] Gao Huang, Yu Sun, Zhuang Liu, Daniel Sedra, and Kilian Q Weinberger. Deep networks with stochastic  
104 depth. In *European Conference on Computer Vision (ECCV)*, 2016.
- 105 [12] Gang Li, Heliang Zheng, Daqing Liu, Chaoyue Wang, Bing Su, and Changwen Zheng. Semmae: Semantic-  
106 guided masking for learning masked autoencoders. In *Advances in Neural Information Processing Systems*  
107 *(NeurIPS)*, 2022.
- 108 [13] Yanghao Li, Hanzhi Mao, Ross Girshick, and Kaiming He. Exploring plain vision transformer backbones  
109 for object detection. In *European Conference on Computer Vision (ECCV)*, pages 280–296. Springer, 2022.
- 110 [14] Tsung-Yi Lin, Piotr Dollár, Ross Girshick, Kaiming He, Bharath Hariharan, and Serge Belongie. Feature  
111 pyramid networks for object detection. In *Proceedings of the IEEE/CVF Conference on Computer Vision*  
112 *and Pattern Recognition (CVPR)*, pages 2117–2125, 2017.
- 113 [15] Tsung-Yi Lin, Michael Maire, Serge Belongie, James Hays, Pietro Perona, Deva Ramanan, Piotr Dollár,  
114 and C Lawrence Zitnick. Microsoft coco: Common objects in context. In *European Conference on*  
115 *Computer Vision (ECCV)*, pages 740–755. Springer, 2014.
- 116 [16] Olga Russakovsky, Jia Deng, Hao Su, Jonathan Krause, Sanjeev Satheesh, Sean Ma, Zhiheng Huang,  
117 Andrej Karpathy, Aditya Khosla, Michael Bernstein, et al. Imagenet large scale visual recognition challenge.  
118 *International Journal of Computer Vision (IJCV)*, 115:211–252, 2015.

- 119 [17] Ashish Vaswani, Noam Shazeer, Niki Parmar, Jakob Uszkoreit, Llion Jones, Aidan N Gomez, Łukasz  
120 Kaiser, and Illia Polosukhin. Attention is all you need. *Advances in Neural Information Processing Systems*  
121 (*NeurIPS*), 30, 2017.
- 122 [18] Haochen Wang, Kaiyou Song, Junsong Fan, Yuxi Wang, Jin Xie, and Zhaoxiang Zhang. Hard patches  
123 mining for masked image modeling. In *Proceedings of the IEEE/CVF Conference on Computer Vision and*  
124 *Pattern Recognition (CVPR)*, 2023.
- 125 [19] Haoqing Wang, Yehui Tang, Yunhe Wang, Jianyuan Guo, Zhi-Hong Deng, and Kai Han. Masked image  
126 modeling with local multi-scale reconstruction. In *Proceedings of the IEEE/CVF Conference on Computer*  
127 *Vision and Pattern Recognition (CVPR)*, 2023.
- 128 [20] Tete Xiao, Yingcheng Liu, Bolei Zhou, Yuning Jiang, and Jian Sun. Unified perceptual parsing for scene  
129 understanding. In *European Conference on Computer Vision (ECCV)*, pages 418–434, 2018.
- 130 [21] Sangdoon Yun, Dongyoon Han, Seong Joon Oh, Sanghyuk Chun, Junsuk Choe, and Youngjoon Yoo.  
131 Cutmix: Regularization strategy to train strong classifiers with localizable features. In *Proceedings of the*  
132 *IEEE/CVF International Conference on Computer Vision (ICCV)*, pages 6023–6032, 2019.
- 133 [22] Hongyi Zhang, Moustapha Cisse, Yann N Dauphin, and David Lopez-Paz. mixup: Beyond empirical risk  
134 minimization. 2018.
- 135 [23] Bolei Zhou, Hang Zhao, Xavier Puig, Sanja Fidler, Adela Barriuso, and Antonio Torralba. Scene parsing  
136 through ade20k dataset. In *Proceedings of the IEEE/CVF Conference on Computer Vision and Pattern*  
137 *Recognition (CVPR)*, pages 633–641, 2017.
- 138 [24] Jinghao Zhou, Chen Wei, Huiyu Wang, Wei Shen, Cihang Xie, Alan Yuille, and Tao Kong. Image bert  
139 pre-training with online tokenizer. In *International Conference on Learning Representations (ICLR)*, 2022.
